# Supplementary material for: Resident macrophage subpopulations occupy distinct microenvironments in the kidney
Source: PubMed Central journal article supplement (PMC9714795; doi:10.1172/jci.insight.161078), 2022-10-24
Supplement: jciinsight-7-161078-s158.pdf [file jciinsight-7-161078-s158.pdf]

## **Supplemental Materials Table of Contents:**

Supplemental Figure 1: Flow cytometry gating scheme to isolate kidney resident macrophages

Supplemental Figure 2: Uniform manifold approximation and projection (UMAP) plot of sequenced kidney resident macrophages (KRM) from all time points

Supplemental Figure 3: Dot plots of key differentially expressed genes from each cluster

Supplemental Figure 4: Uniform manifold approximation and projection (UMAP) and spatial plots derived from spatial sequencing data

Supplemental Figure 5: Uniform manifold approximation and projection (UMAP) plots of kidney cell types derived from single nuclear RNA sequencing

Supplemental Figure 6: Zone-specific transcripts for spatial transcriptomics section 12 hours after injury

Supplemental Figure 7: Zone-specific transcripts for spatial transcriptomics section 1 day after injury

Supplemental Figure 8: Zone-specific transcripts for spatial transcriptomics section 6 days after injury

Supplemental Figure 9: Zone-specific transcripts for spatial transcriptomics section 28 days after injury

**Supplemental Spreadsheet:** Full list of differentially expressed genes for all clusters at all time points.

**Supplemental Figures:**

**Supplemental Figure 1**

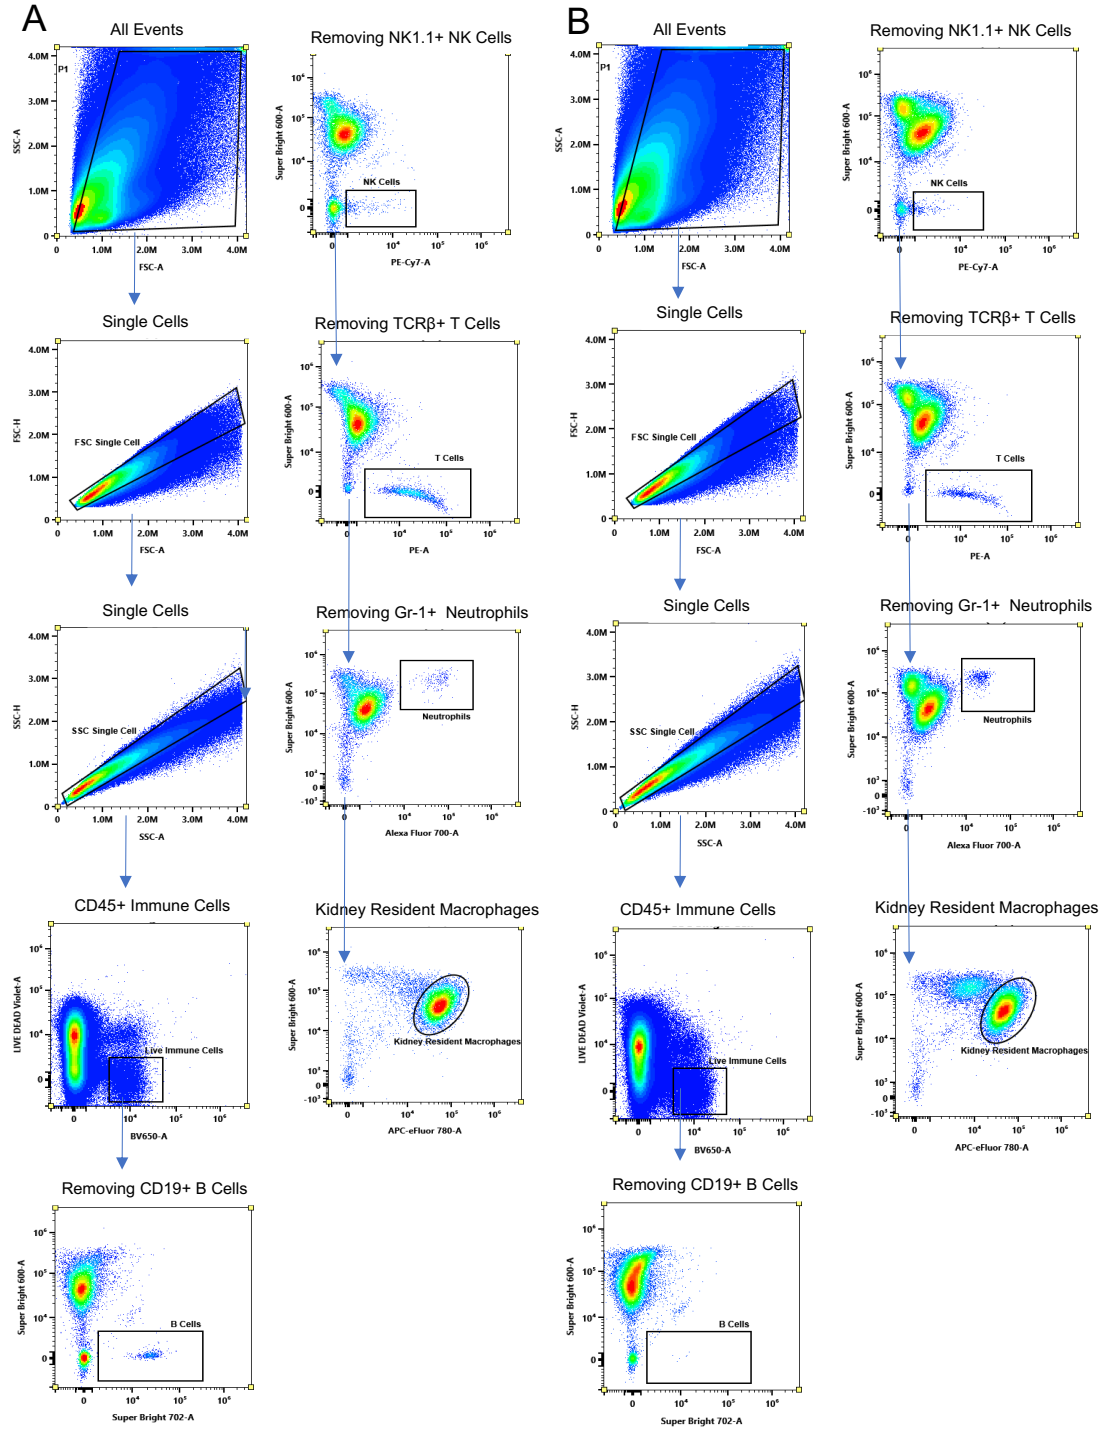

**Supplemental Figure 1: Flow cytometry gating scheme to isolate kidney resident macrophages**

Gating strategy from kidney single-cell suspensions using pseudocolor defaults both A) pre-injury and B) post-injury.

## Supplemental Figure 2

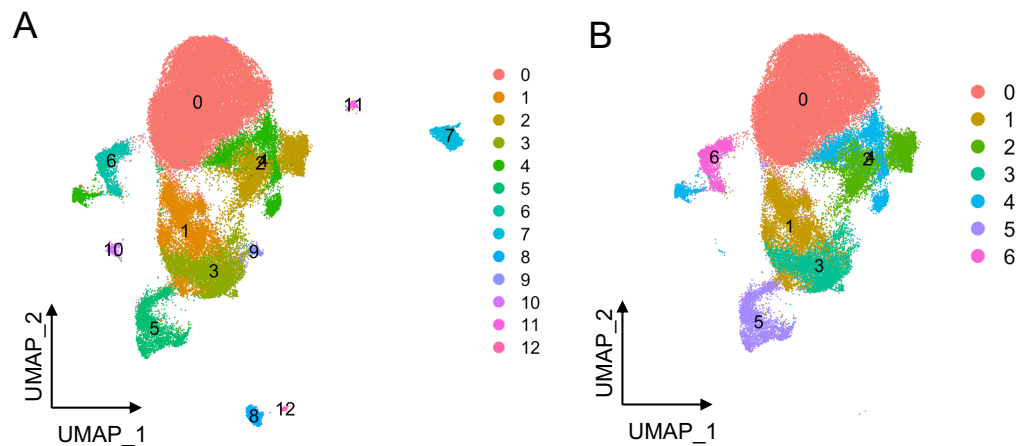

### Supplemental Figure 2: Uniform manifold approximation and projection (UMAP) plot of sequenced kidney resident macrophages (KRM) from all time points

A) Uniform manifold approximation and projection (UMAP) plot of sequenced kidney resident macrophages (KRM) from all time points (quiescence, 12 hours, day 1, day 6, and day 28 post-injury) demonstrates thirteen unique clusters. Contaminating kidney parenchymal cells and clusters representing less than 1% of the population were included. B) UMAP plot of sequenced KRM from all time points (quiescence, 12 hours, day 1, day 6, and day 28 post-injury) demonstrates seven unique clusters. Contaminating kidney parenchymal cells and clusters representing less than 1% of the population were omitted from the analysis.



### Supplemental Figure 3

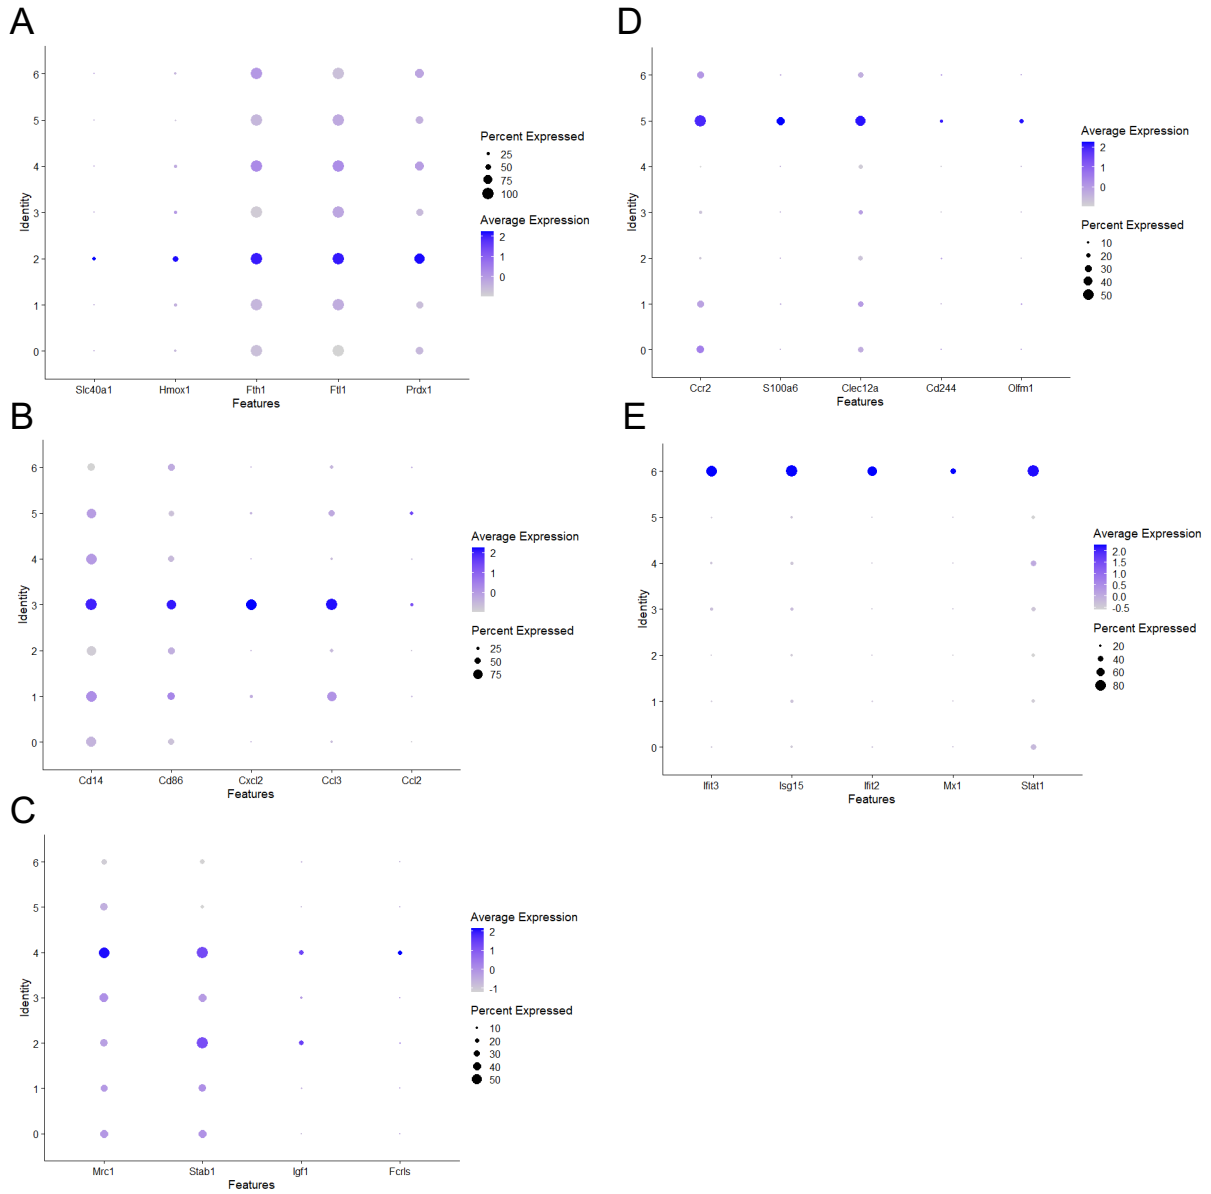

### Supplemental Figure 3: Dot plots of key differentially expressed genes from each cluster

Dot plots of key differentially expressed genes from A) cluster 2, B) cluster 3, C) cluster 4, D) cluster 5 and E) cluster 6

Supplemental Figure 4

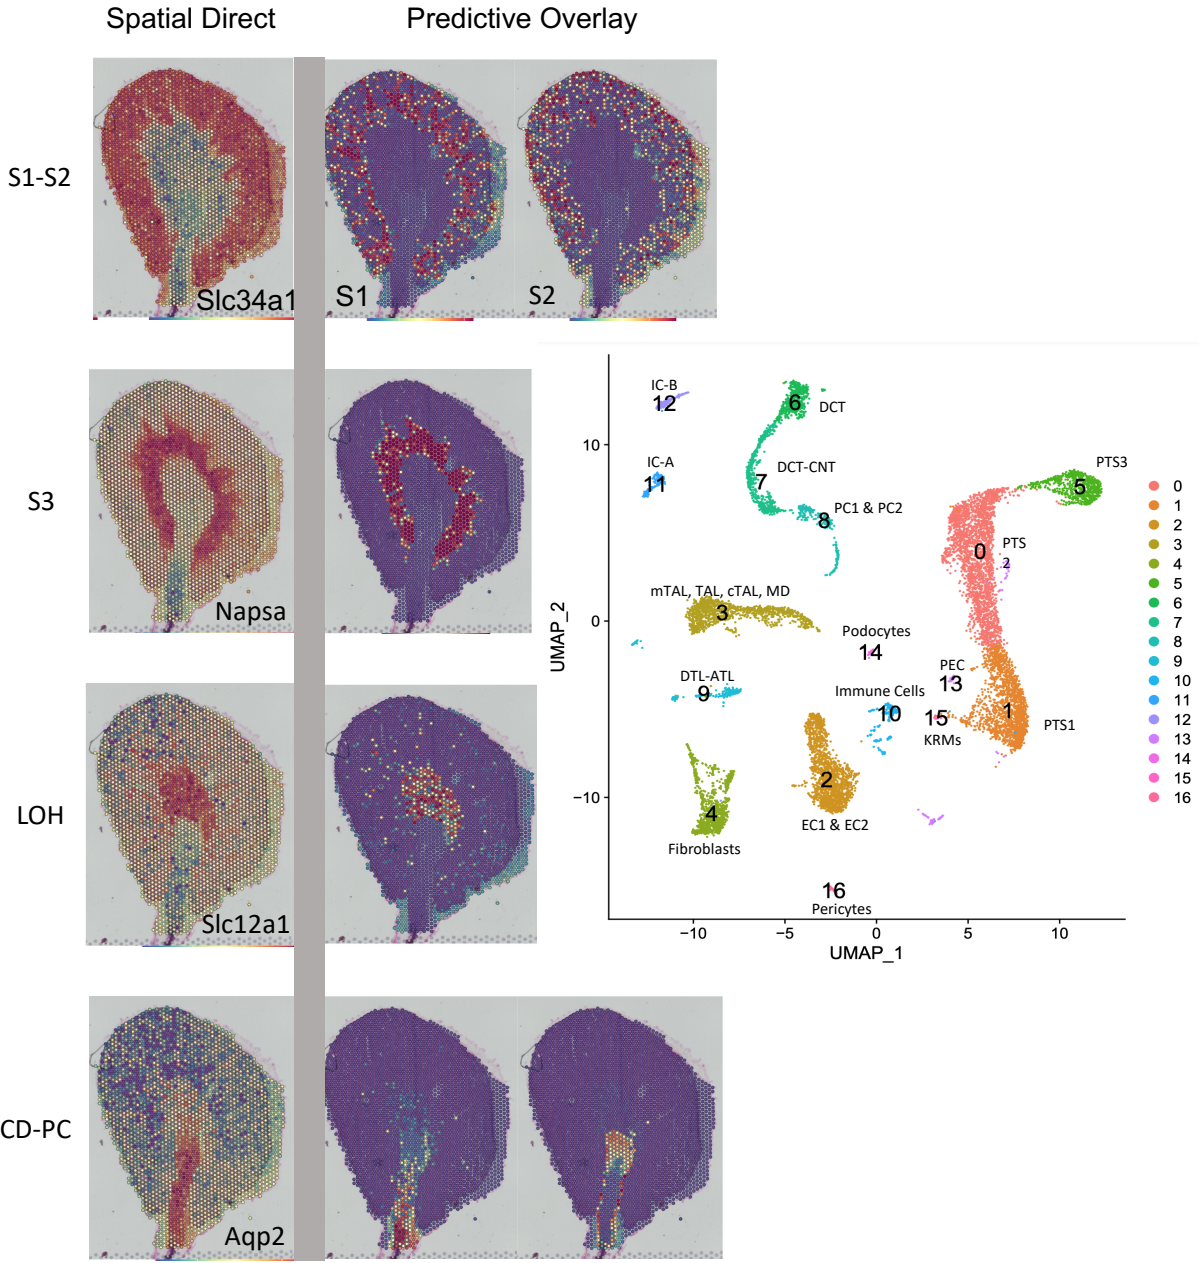

Supplemental Figure 4: Uniform manifold approximation and projection (UMAP) and spatial plots derived from spatial sequencing data

A) Uniform manifold approximation and projection (UMAP) plots derived from spatial sequencing data (left). Spatial plotting of kidney cell types onto spatial histological image (right).

B) Spatial gene expression plots of *Slc34a1* (left) and *Umod* (right).

Supplemental Figure 5

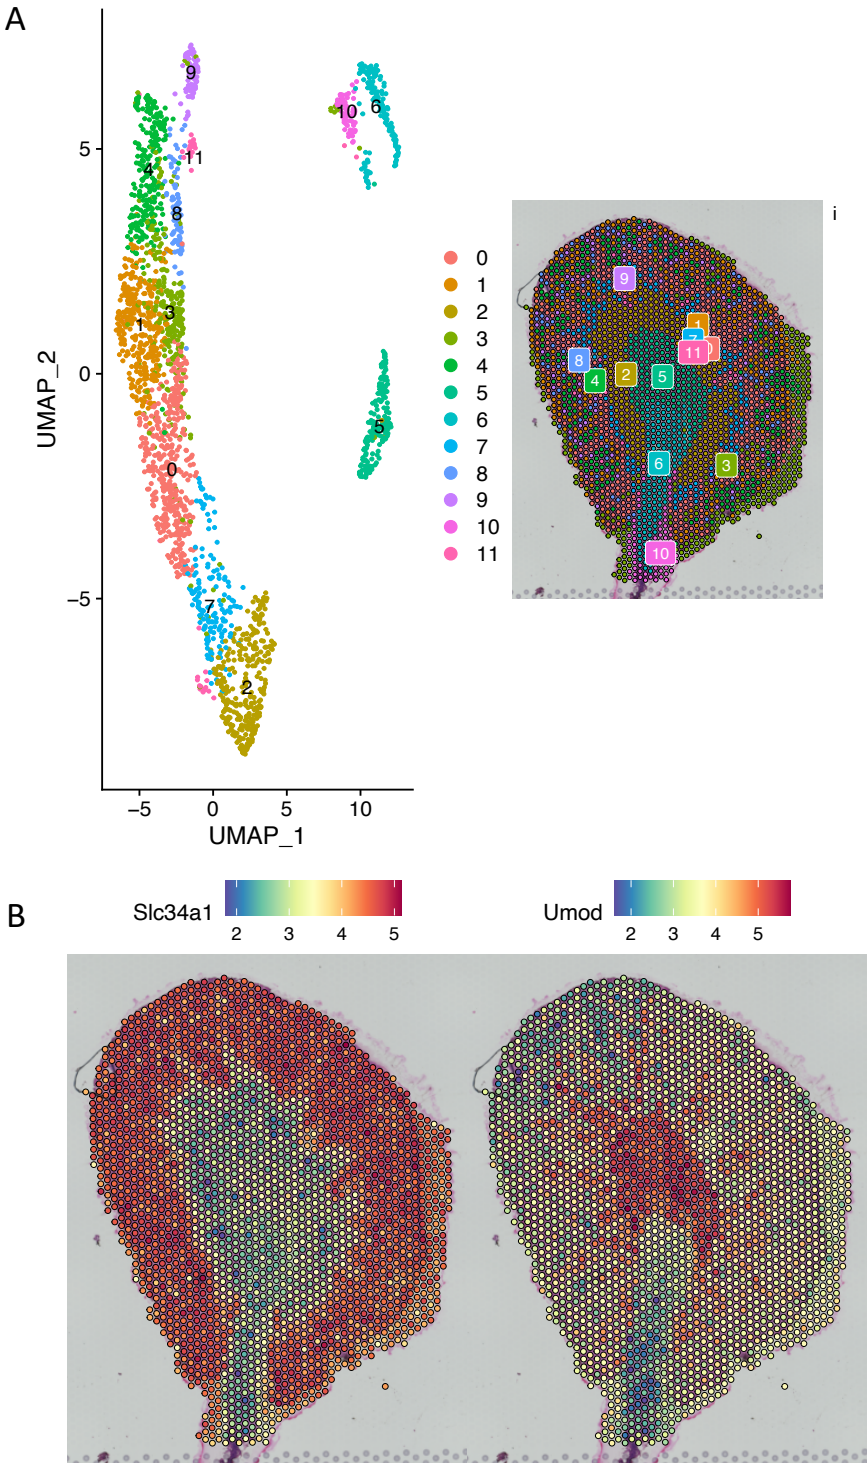

**Supplemental Figure 5: Uniform manifold approximation and projection (UMAP) plots of kidney cell types derived from single nuclear RNA sequencing**

Uniform manifold approximation and projection (UMAP) plots of kidney cell types derived from single nuclear RNA sequencing (right). Spatial plotting of kidney cell types from single nuclear RNA sequencing onto spatial histological image. The regions of the nephron were mapped using transcripts associated with specific cell types (e.g. *Slc34a1* for the S1/S2 region of the proximal tubule or *Umod* for the ascending loop of Henle).

Supplemental Figure 6 – 12 hour

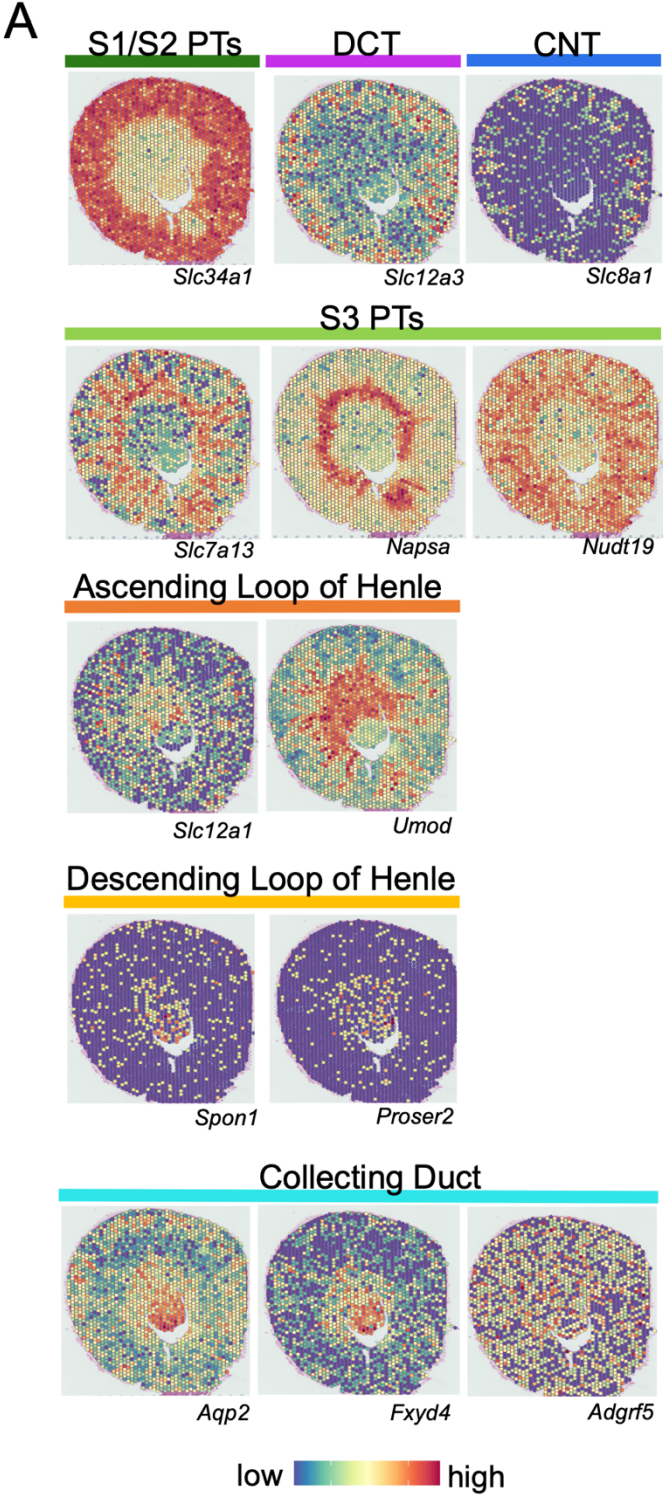

**Supplemental Figure 6: Zone-specific transcripts for spatial transcriptomics section 12 hours after injury**

The spatial location of the nephron segments are shown by mapping segment-specific transcripts onto the histological image. Transcript markers are listed in the bottom right-hand corner of each section. Specific nephron segments are listed above each image. Colored bars correspond to the location of the segments from the nephron in the left panel from Figure 3.



# Supplemental Figure 7 – Day 1

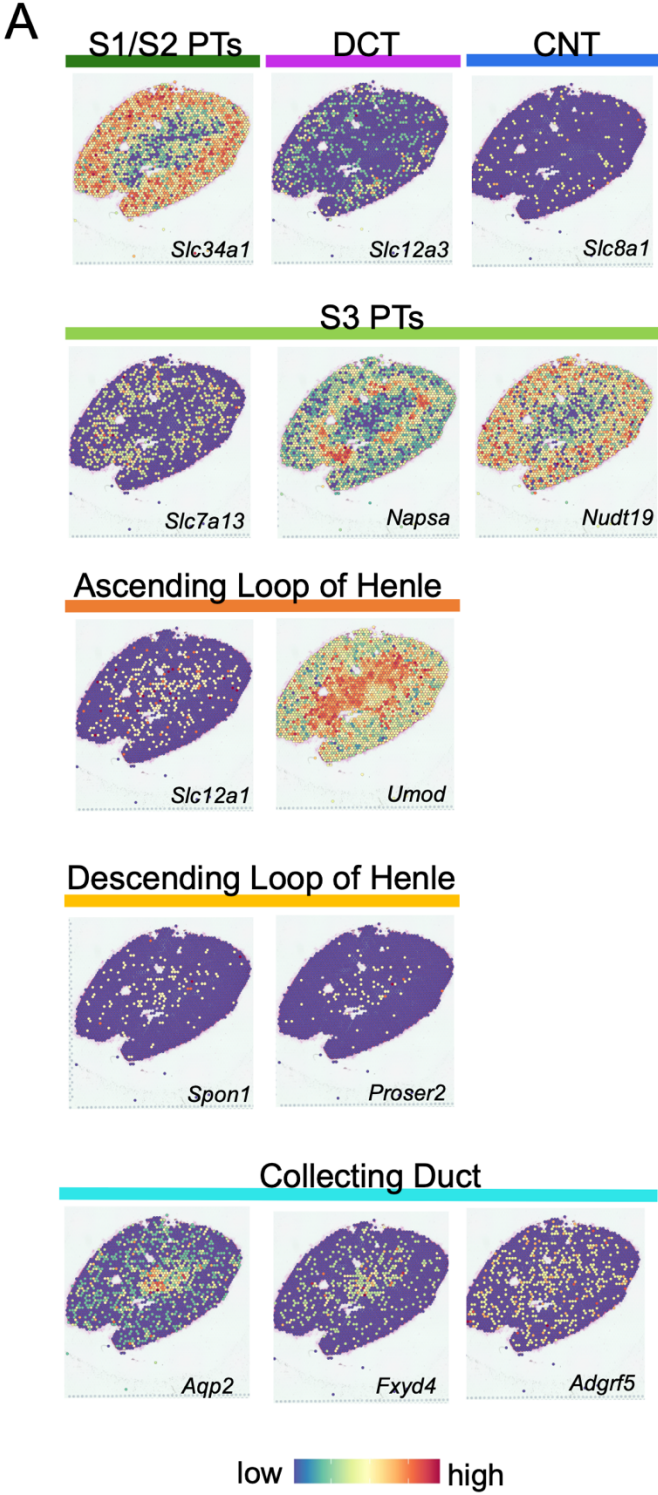



**Supplemental Figure 7: Zone-specific transcripts for spatial transcriptomics section 1 day after injury**

The spatial location of the nephron segments are shown by mapping segment-specific transcripts onto the histological image. Transcript markers are listed in the bottom right-hand corner of each section. Specific nephron segments are listed above each image. Colored bars correspond to the location of the segments from the nephron in the left panel Figure 3.

# Supplemental Figure 8 – Day 6

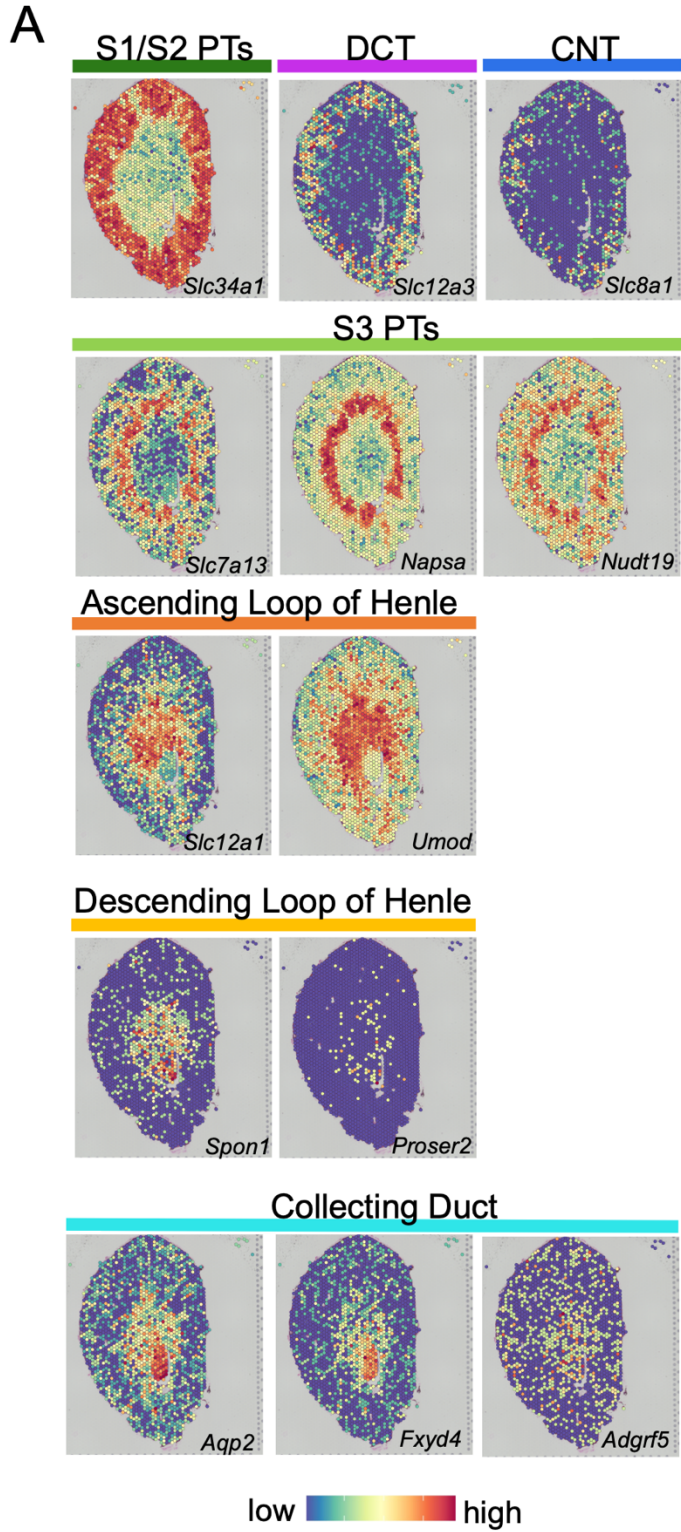

**Supplemental Figure 8: Zone-specific transcripts for spatial transcriptomics section 6 days after injury**

The spatial location of the nephron segments are shown by mapping segment-specific transcripts onto the histological image. Transcript markers are listed in the bottom right-hand corner of each section. Specific nephron segments are listed above each image. Colored bars correspond to the location of the segments from the nephron in the left panel from Figure 3.

# Supplemental Figure 9 – Day 28

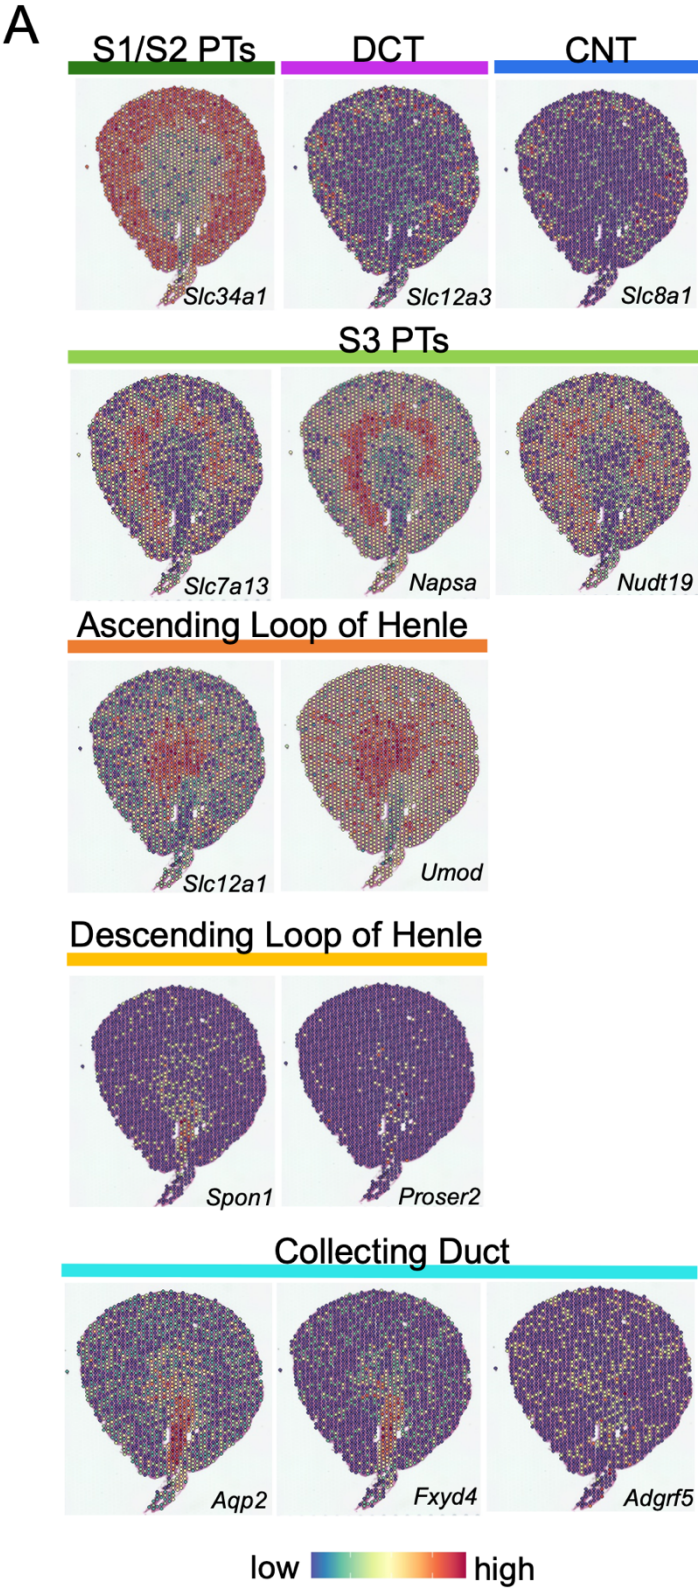

**Supplemental Figure 9: Zone-specific transcripts for spatial transcriptomics section 28 days after injury**

The spatial location of the nephron segments are shown by mapping segment-specific transcripts onto the histological image. Transcript markers are listed in the bottom right-hand corner of each section. Specific nephron segments are listed above each image. Colored bars correspond to the location of the segments from the nephron in the left panel from Figure 3.

Supplemental  
Table 1

**Gene Ontology Analysis  
Day 1**

| Cluster | Gene Set   | Description                                                      | Enrichment |          |        |
|---------|------------|------------------------------------------------------------------|------------|----------|--------|
|         |            |                                                                  | Ratio      | p-Value  | FDR    |
| 0       | GO:0002478 | antigen processing and presentation of exogenous peptide antigen | 105.4      | 1.60E-04 | 0.0504 |
| 0       | GO:0033077 | T cell differentiation in thymus                                 | 32.7       | 1.00E-04 | 0.0504 |
| 0       | GO:0019724 | B cell mediated immunity                                         | 25.9       | 2.01E-04 | 0.0504 |
| 0       | GO:2001233 | regulation of apoptotic signaling pathway                        | 12.1       | 4.35E-05 | 0.0504 |
| 1       | GO:0043921 | modulation by host of viral transcription                        | 81.3       | 6.48E-06 | 0.0009 |
| 1       | GO:0002548 | monocyte chemotaxis                                              | 39.9       | 5.72E-05 | 0.0047 |
| 1       | GO:0032611 | interleukin-1 beta production                                    | 29.5       | 1.41E-04 | 0.0090 |
| 1       | GO:0002688 | regulation of leukocyte chemotaxis                               | 24.9       | 1.90E-05 | 0.0021 |
| 1       | GO:0007088 | regulation of mitotic nuclear division                           | 16.5       | 9.37E-05 | 0.0069 |
| 1       | GO:0032496 | response to lipopolysaccharide                                   | 16.0       | 2.18E-08 | 0.0000 |
| 1       | GO:1903706 | regulation of hemopoiesis                                        | 14.4       | 4.85E-08 | 0.0000 |
| 1       | GO:0050727 | regulation of inflammatory response                              | 13.0       | 5.33E-06 | 0.0008 |
| 1       | GO:0030099 | myeloid cell differentiation                                     | 11.1       | 1.28E-05 | 0.0015 |
| 2       | GO:0034368 | protein-lipid complex remodeling                                 | 95.1       | 1.97E-04 | 0.0614 |
| 2       | GO:0033006 | regulation of mast cell activation involved in immune response   | 62.4       | 4.63E-04 | 0.0904 |
| 2       | GO:0010039 | response to iron ion                                             | 58.7       | 5.23E-04 | 0.0904 |
| 3       | GO:1990869 | cellular response to chemokine                                   | 23.2       | 1.90E-09 | 0.0000 |
| 3       | GO:0045428 | regulation of nitric oxide biosynthetic process                  | 22.7       | 2.50E-07 | 0.0000 |
| 3       | GO:0032611 | interleukin-1 beta production                                    | 21.4       | 3.59E-07 | 0.0000 |
| 3       | GO:0030593 | neutrophil chemotaxis                                            | 18.5       | 9.83E-08 | 0.0000 |
| 3       | GO:1990266 | neutrophil migration                                             | 15.7       | 3.13E-07 | 0.0000 |
| 3       | GO:0071222 | cellular response to lipopolysaccharide                          | 14.8       | 3.63E-12 | 0.0000 |
| 3       | GO:0032640 | tumor necrosis factor production                                 | 13.4       | 1.44E-07 | 0.0000 |
| 3       | GO:0071248 | cellular response to metal ion                                   | 12.3       | 4.95E-08 | 0.0000 |
| 3       | GO:2000377 | regulation of reactive oxygen species metabolic process          | 11.8       | 6.86E-08 | 0.0000 |
| 3       | GO:0060326 | cell chemotaxis                                                  | 8.8        | 1.92E-07 | 0.0000 |
| 3       | GO:0097193 | intrinsic apoptotic signaling pathway                            | 8.7        | 2.18E-07 | 0.0000 |
| 3       | GO:0050900 | leukocyte migration                                              | 8.6        | 5.59E-08 | 0.0000 |
| 3       | GO:0042110 | T cell activation                                                | 8.1        | 3.93E-10 | 0.0000 |
| 4       | GO:1990868 | response to chemokine                                            | 35.5       | 9.43E-10 | 0.0000 |
| 4       | GO:0097529 | myeloid leukocyte migration                                      | 20.8       | 3.81E-10 | 0.0000 |
| 4       | GO:0070555 | response to <a href="#">interleukin-1</a>                        | 14.7       | 1.54E-04 | 0.0223 |
| 4       | GO:0050920 | regulation of chemotaxis                                         | 10.7       | 9.85E-05 | 0.0156 |
| 5       | GO:0097529 | myeloid leukocyte migration                                      | 8.2        | 4.61E-10 | 0.0000 |
| 5       | GO:0030595 | leukocyte chemotaxis                                             | 8.2        | 1.23E-10 | 0.0000 |
| 5       | GO:0006909 | phagocytosis                                                     | 8.0        | 9.97E-09 | 0.0000 |
| 5       | GO:0042110 | T cell activation                                                | 3.8        | 2.65E-06 | 0.0002 |
| 6       | GO:0035457 | cellular response to interferon-alpha                            | 97.3       | 1.61E-11 | 0.0000 |
| 6       | GO:0034340 | response to type I interferon                                    | 27.0       | 1.09E-06 | 0.0001 |
| 6       | GO:0009615 | response to virus                                                | 20.6       | 0        | 0.0000 |
| 6       | GO:0045088 | regulation of innate immune response                             | 19.7       | 0        | 0.0000 |
| 6       | GO:0034341 | response to interferon-gamma                                     | 18.9       | 1.60E-12 | 0.0000 |

Supplemental Table 1: Gene ontology analysis of KRM clusters 1 day after injury

Gene ontology analysis of terms with an FDR < 0.05, with the exceptions of clusters 0 and 2 where no gene sets met this requirement. The top four and three terms were listed, respectively.

Supplemental  
Table 2

**Gene Ontology Analysis  
Day 6<sup>1</sup>**

| Cluster | Gene Set   | Description                                                 | Enrichment |          |        |
|---------|------------|-------------------------------------------------------------|------------|----------|--------|
|         |            |                                                             | Ratio      | p-Value  | FDR    |
| 1       | GO:0038086 | p38MAPK cascade                                             | 55.6       | 7.56E-07 | 0.0003 |
| 1       | GO:0030099 | myeloid cell differentiation                                | 11.7       | 1.63E-06 | 0.0004 |
| 1       | GO:0070371 | ERK1 and ERK2 cascade                                       | 10.7       | 1.68E-05 | 0.0022 |
| 1       | GO:0071222 | cellular response to lipopolysaccharide                     | 14.2       | 2.44E-05 | 0.0028 |
| 1       | GO:0097191 | extrinsic apoptotic signaling pathway                       | 14.1       | 2.49E-05 | 0.0028 |
| 1       | GO:0042110 | T cell activation                                           | 8.0        | 8.44E-05 | 0.0070 |
| 1       | GO:0002685 | regulation of leukocyte migration                           | 13.1       | 2.33E-04 | 0.0145 |
| 2       | GO:0030595 | leukocyte chemotaxis                                        | 10.4       | 4.86E-06 | 0.0050 |
| 2       | GO:0070371 | ERK1 and ERK2 cascade                                       | 6.9        | 1.93E-05 | 0.0080 |
| 2       | GO:0097530 | granulocyte migration                                       | 10.9       | 9.54E-05 | 0.0138 |
| 2       | GO:1990888 | response to chemokine                                       | 14.0       | 1.94E-04 | 0.0208 |
| 2       | GO:0072676 | lymphocyte migration                                        | 12.6       | 2.86E-04 | 0.0254 |
| 2       | GO:0043542 | endothelial cell migration                                  | 8.0        | 4.10E-04 | 0.0297 |
| 2       | GO:0002548 | monocyte chemotaxis                                         | 17.4       | 6.79E-04 | 0.0428 |
| 3       | GO:0032496 | response to lipopolysaccharide                              | 14.9       | 0        | 0.0000 |
| 3       | GO:1903706 | regulation of hemopoiesis                                   | 11.5       | 1.35E-14 | 0.0000 |
| 3       | GO:0002685 | regulation of leukocyte migration                           | 14.1       | 3.20E-10 | 0.0000 |
| 3       | GO:0034612 | response to tumor necrosis factor                           | 13.8       | 4.24E-10 | 0.0000 |
| 3       | GO:1990266 | neutrophil migration                                        | 19.7       | 7.79E-10 | 0.0000 |
| 3       | GO:0097191 | extrinsic apoptotic signaling pathway                       | 12.2       | 1.55E-09 | 0.0000 |
| 3       | GO:1990888 | response to chemokine                                       | 22.6       | 2.33E-09 | 0.0000 |
| 3       | GO:0097530 | granulocyte migration                                       | 15.9       | 5.15E-09 | 0.0000 |
| 3       | GO:0070372 | regulation of ERK1 and ERK2 cascade                         | 8.8        | 1.02E-08 | 0.0000 |
| 3       | GO:0030595 | leukocyte chemotaxis                                        | 12.0       | 1.04E-08 | 0.0000 |
| 3       | GO:0002573 | myeloid leukocyte differentiation                           | 11.5       | 1.51E-08 | 0.0000 |
| 3       | GO:0071621 | granulocyte chemotaxis                                      | 16.7       | 2.60E-08 | 0.0000 |
| 3       | GO:0070555 | response to interleukin-1                                   | 16.4       | 2.97E-08 | 0.0000 |
| 3       | GO:0002224 | toll-like receptor signaling pathway                        | 18.3       | 1.09E-07 | 0.0000 |
| 3       | GO:0010574 | regulation of vascular endothelial growth factor production | 38.7       | 1.72E-07 | 0.0000 |
| 3       | GO:0032640 | tumor necrosis factor production                            | 13.1       | 1.76E-07 | 0.0000 |
| 4       | GO:0097529 | myeloid leukocyte migration                                 | 19.1       | 9.17E-11 | 0.0000 |
| 4       | GO:0071674 | mononuclear cell migration                                  | 33.9       | 1.37E-09 | 0.0000 |
| 4       | GO:1990888 | response to chemokine                                       | 29.5       | 3.67E-09 | 0.0000 |
| 4       | GO:0070555 | response to interleukin-1                                   | 21.4       | 3.45E-08 | 0.0000 |
| 4       | GO:0034612 | response to tumor necrosis factor                           | 13.1       | 1.01E-06 | 0.0003 |
| 4       | GO:0046718 | viral entry into host cell                                  | 27.1       | 1.10E-06 | 0.0003 |
| 4       | GO:0070371 | ERK1 and ERK2 cascade                                       | 8.3        | 4.59E-06 | 0.0009 |
| 4       | GO:0002685 | regulation of leukocyte migration                           | 11.5       | 1.32E-05 | 0.0023 |
| 4       | GO:0050920 | regulation of chemotaxis                                    | 10.7       | 1.99E-05 | 0.0033 |
| 4       | GO:0035455 | response to interferon-alpha                                | 44.8       | 4.00E-05 | 0.0059 |
| 5       | GO:0002548 | monocyte chemotaxis                                         | 81.4       | 2.11E-12 | 0.0000 |
| 5       | GO:0048247 | lymphocyte chemotaxis                                       | 58.1       | 2.19E-08 | 0.0000 |
| 5       | GO:0048245 | eosinophil chemotaxis                                       | 118.6      | 3.17E-08 | 0.0000 |
| 5       | GO:0071621 | granulocyte chemotaxis                                      | 30.9       | 3.46E-08 | 0.0000 |
| 5       | GO:0009611 | response to wounding                                        | 10.9       | 7.58E-08 | 0.0000 |
| 5       | GO:0030593 | neutrophil chemotaxis                                       | 31.9       | 4.60E-07 | 0.0001 |
| 5       | GO:0070371 | ERK1 and ERK2 cascade                                       | 12.1       | 1.35E-06 | 0.0003 |
| 5       | GO:0050883 | regulation of T cell activation                             | 12.3       | 7.70E-06 | 0.0011 |
| 5       | GO:0090025 | regulation of monocyte chemotaxis                           | 71.2       | 9.77E-06 | 0.0014 |
| 5       | GO:0071675 | regulation of mononuclear cell migration                    | 39.5       | 5.89E-05 | 0.0060 |
| 5       | GO:0045625 | regulation of T-helper 1 cell differentiation               | 98.8       | 1.80E-04 | 0.0127 |
| 5       | GO:0032717 | negative regulation of interleukin-8 production             | 79.1       | 2.85E-04 | 0.0178 |
| 6       | GO:0035456 | response to interferon-beta                                 | 165.0      | 0        | 0.0000 |
| 6       | GO:0009615 | response to virus                                           | 34.6       | 1.11E-16 | 0.0000 |
| 6       | GO:0002218 | activation of innate immune response                        | 41.8       | 8.53E-12 | 0.0000 |
| 6       | GO:0035455 | response to interferon-alpha                                | 137.5      | 1.72E-08 | 0.0000 |
| 6       | GO:0034340 | response to type I interferon                               | 63.5       | 1.38E-05 | 0.0072 |

<sup>1</sup> No significant results were returned for cluster 0

**Supplemental Table 2: Gene ontology analysis of KRM clusters 6 days after injury**

Gene ontology analysis of terms with an FDR < 0.05.



Supplemental  
Table 3

| <b>Gene Ontology Analysis<br/>Day 28<sup>1</sup></b> |            |                                                                 |            |          |        |
|------------------------------------------------------|------------|-----------------------------------------------------------------|------------|----------|--------|
| Cluster                                              | Gene Set   | Description                                                     | Enrichment |          |        |
|                                                      |            |                                                                 | Ratio      | p-Value  | FDR    |
| 1                                                    | GO:0032496 | response to lipopolysaccharide                                  | 16.6       | 1.58E-08 | 0.0000 |
| 1                                                    | GO:0043921 | modulation by host of viral transcription                       | 84.3       | 5.79E-06 | 0.0008 |
| 1                                                    | GO:0070371 | ERK1 and ERK2 cascade                                           | 12.3       | 7.17E-06 | 0.0008 |
| 1                                                    | GO:0051403 | stress-activated MAPK cascade                                   | 14.4       | 2.16E-05 | 0.0018 |
| 1                                                    | GO:0050729 | positive regulation of inflammatory response                    | 23.2       | 2.47E-05 | 0.0020 |
| 1                                                    | GO:0002548 | monocyte chemotaxis                                             | 41.3       | 5.11E-05 | 0.0036 |
| 1                                                    | GO:0051384 | response to glucocorticoid                                      | 17.5       | 7.53E-05 | 0.0049 |
| 2                                                    | GO:0010631 | epithelial cell migration                                       | 18.7       | 5.26E-06 | 0.0096 |
| 2                                                    | GO:0071281 | cellular response to iron ion                                   | 186.4      | 6.23E-05 | 0.0248 |
| 2                                                    | GO:0034388 | protein-lipid complex remodeling                                | 95.1       | 1.97E-04 | 0.0455 |
| 2                                                    | GO:0001936 | regulation of endothelial cell proliferation                    | 25.4       | 2.11E-04 | 0.0470 |
| 3                                                    | GO:0032496 | response to lipopolysaccharide                                  | 16.9       | 6.66E-16 | 0.0000 |
| 3                                                    | GO:0071219 | cellular response to molecule of bacterial origin               | 19.3       | 9.01E-13 | 0.0000 |
| 3                                                    | GO:0051384 | response to glucocorticoid                                      | 17.8       | 1.45E-08 | 0.0000 |
| 3                                                    | GO:0050729 | positive regulation of inflammatory response                    | 20.7       | 4.35E-08 | 0.0000 |
| 3                                                    | GO:0070098 | chemokine-mediated signaling pathway                            | 28.6       | 6.16E-08 | 0.0000 |
| 3                                                    | GO:0002548 | monocyte chemotaxis                                             | 35.1       | 2.99E-07 | 0.0000 |
| 3                                                    | GO:0070371 | ERK1 and ERK2 cascade                                           | 9.4        | 4.08E-07 | 0.0000 |
| 3                                                    | GO:0050786 | positive regulation of phagocytosis                             | 32.5       | 4.39E-07 | 0.0000 |
| 3                                                    | GO:0008630 | intrinsic apoptotic signaling pathway in response to DNA damage | 19.7       | 5.77E-07 | 0.0000 |
| 3                                                    | GO:0002685 | regulation of leukocyte migration                               | 13.4       | 8.48E-07 | 0.0001 |
| 3                                                    | GO:1902532 | negative regulation of intracellular signal transduction        | 7.3        | 9.00E-07 | 0.0001 |
| 3                                                    | GO:2001233 | regulation of apoptotic signaling pathway                       | 8.2        | 1.22E-06 | 0.0001 |
| 4                                                    | GO:0070098 | chemokine-mediated signaling pathway                            | 63.2       | 3.95E-07 | 0.0014 |
| 4                                                    | GO:0034341 | response to interferon-gamma                                    | 35.4       | 4.05E-06 | 0.0050 |
| 4                                                    | GO:0071219 | cellular response to molecule of bacterial origin               | 21.3       | 3.03E-05 | 0.0235 |
| 4                                                    | GO:0034389 | plasma lipoprotein particle remodeling                          | 112.9      | 1.39E-04 | 0.0404 |
| 4                                                    | GO:0032496 | response to lipopolysaccharide                                  | 14.0       | 1.54E-04 | 0.0404 |
| 4                                                    | GO:0070371 | ERK1 and ERK2 cascade                                           | 13.8       | 1.61E-04 | 0.0404 |
| 4                                                    | GO:0097530 | granulocyte migration                                           | 26.2       | 1.88E-04 | 0.0404 |
| 5                                                    | GO:0034341 | response to interferon-gamma                                    | 13.9       | 1.76E-08 | 0.0001 |
| 5                                                    | GO:0048247 | lymphocyte chemotaxis                                           | 20.2       | 4.73E-06 | 0.0045 |
| 5                                                    | GO:0070098 | chemokine-mediated signaling pathway                            | 13.7       | 3.17E-05 | 0.0164 |
| 5                                                    | GO:0008909 | phagocytosis                                                    | 7.4        | 1.62E-04 | 0.0481 |
| 6                                                    | GO:0045089 | positive regulation of innate immune response                   | 21.9       | 0        | 0.0000 |
| 6                                                    | GO:0045071 | negative regulation of viral genome replication                 | 43.8       | 4.56E-13 | 0.0000 |
| 6                                                    | GO:0071346 | cellular response to interferon-gamma                           | 19.2       | 9.55E-10 | 0.0000 |
| 6                                                    | GO:1900225 | regulation of NLRP3 inflammasome complex assembly               | 56.1       | 1.86E-05 | 0.0019 |
| 6                                                    | GO:0038094 | Fc-gamma receptor signaling pathway                             | 56.1       | 1.86E-05 | 0.0019 |
| 6                                                    | GO:0001981 | positive regulation of cytokine-mediated signaling pathway      | 24.3       | 2.16E-05 | 0.0022 |
| 6                                                    | GO:0002757 | immune response-activating signal transduction                  | 6.6        | 2.77E-05 | 0.0027 |
| 6                                                    | GO:0032680 | regulation of tumor necrosis factor production                  | 10.1       | 2.93E-05 | 0.0029 |
| 6                                                    | GO:0032481 | positive regulation of type I interferon production             | 20.3       | 4.48E-05 | 0.0037 |
| 6                                                    | GO:0032648 | regulation of interferon-beta production                        | 19.9       | 4.86E-05 | 0.0040 |
| 6                                                    | GO:0034121 | regulation of toll-like receptor signaling pathway              | 17.4       | 8.25E-05 | 0.0060 |
| 6                                                    | GO:0032647 | regulation of interferon-alpha production                       | 28.1       | 1.62E-04 | 0.0101 |

<sup>1</sup> No significant results were returned for cluster 0

**Supplemental Table 3: Gene ontology analysis of KRM clusters 28 days after injury**

Gene ontology analysis of terms with an FDR < 0.05.

**Supplemental Spreadsheet:** Full list of differentially expressed genes for all clusters at all time points.
